# Supplementary material for: Controlling the shape of 3D microstructures by temperature and light
Source: PubMed Central journal article supplement (PMC6335428; doi:10.1038/s41467-018-08175-w), 2019-01-16
Supplement: 41467_2018_8175_MOESM1_ESM.pdf [file 41467_2018_8175_MOESM1_ESM.pdf]

## **Supplementary Information**

# **Controlling the Shape of 3D Microstructures by Temperature and Light**

*Marc Hippler, Eva Blasco, Jingyuan Qu, Motomu Tanaka, Christopher Barner-Kowollik,  
Martin Wegener\*, and Martin Bastmeyer\**

## Supplementary Figures

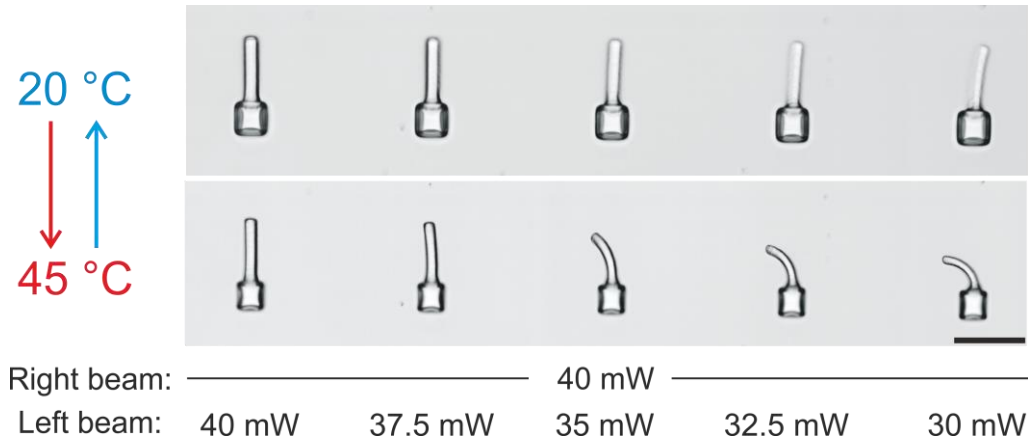

**Supplementary Figure 1.** Temperature response as a function of local exposure dose. The structures are designed as simple bi-material beams with varying local exposure doses (see annotation on bottom). With increasing difference between left and right beam, the bending to the left-hand side gradually increases. Scale bar is 30  $\mu\text{m}$ .

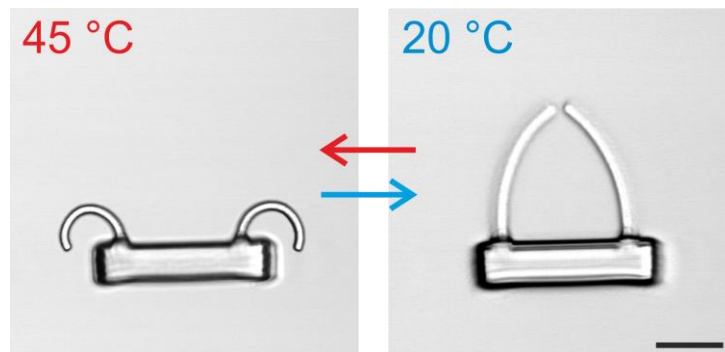

**Supplementary Figure 2.** Operation of a bi-material gripper. The gripper consists of two bi-material beams with the less crosslinked part at the outer side. In this configuration, the gripper is closed at room temperature and opened at elevated temperature. Scale bar is 20  $\mu\text{m}$ .

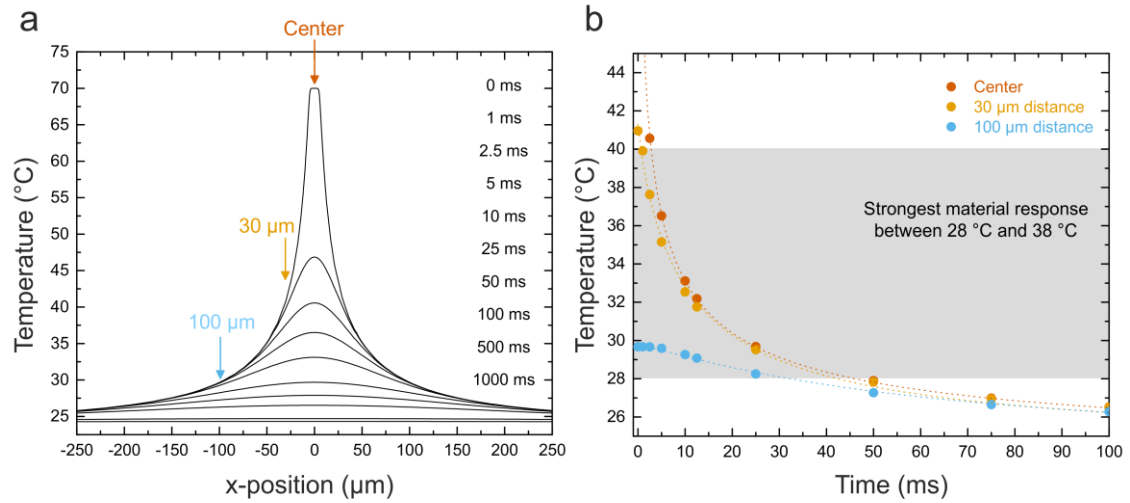

**Supplementary Figure 3.** Calculation of heat diffusion. a) Cuts through the temperature profile in the water bath for different time points after switching off the light. b) Temperature as a function of time for three specific distances from the central base. The grey area marks the nonlinear response regime of the material (see Figure 3b).
